# Supplementary material
Source: Springer Nature journal article supplement (https://www.springermedizin.de/resource/supplementary/12931_2011_1103_MOESM6_ESM.pdf/9425654)

### A. Wild type 0.85-kb Mouse $\alpha_5$ Reporter

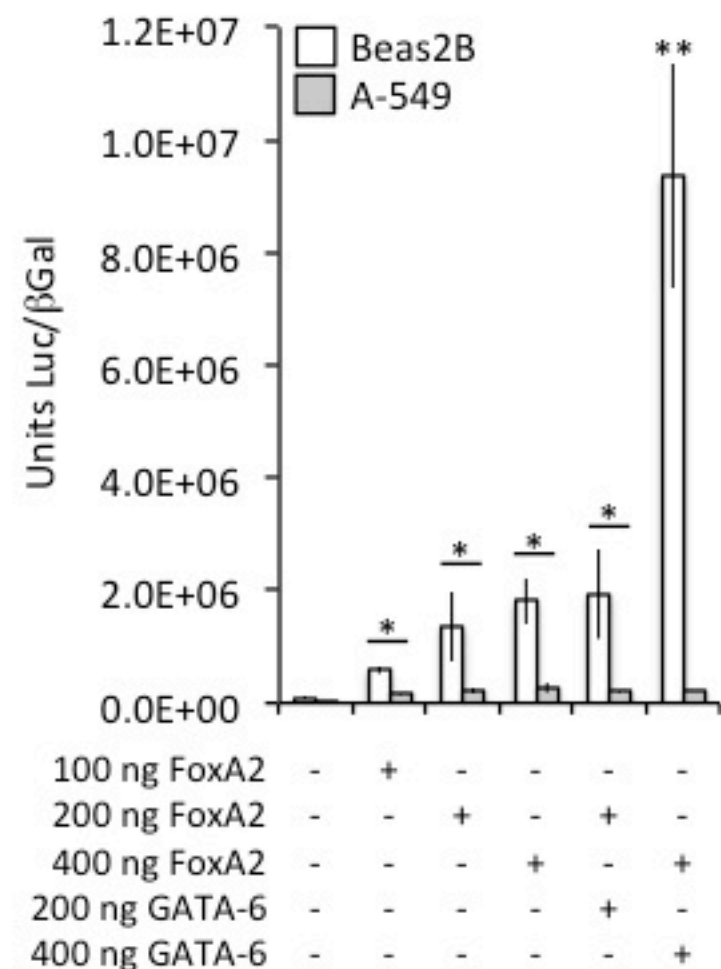

### B. Mutant 0.85-kb Mouse $\alpha_5$ Reporter

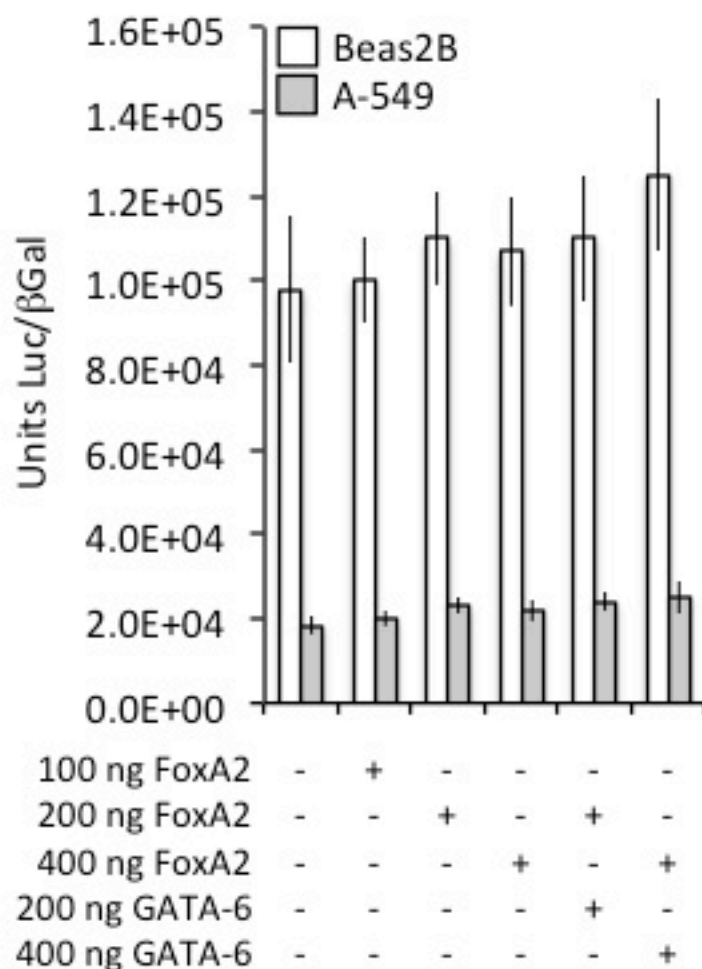

Supplement: MOESM6 [file 9425654]
